# Supplementary material
Source: PubMed Central journal article supplement (PMC2729028)
Supplement: 0804650106_0804650106SI.pdf [file 0804650106_0804650106SI.pdf]

# Supporting Information

Bandeira et al. 10.1073/pnas.0804650106

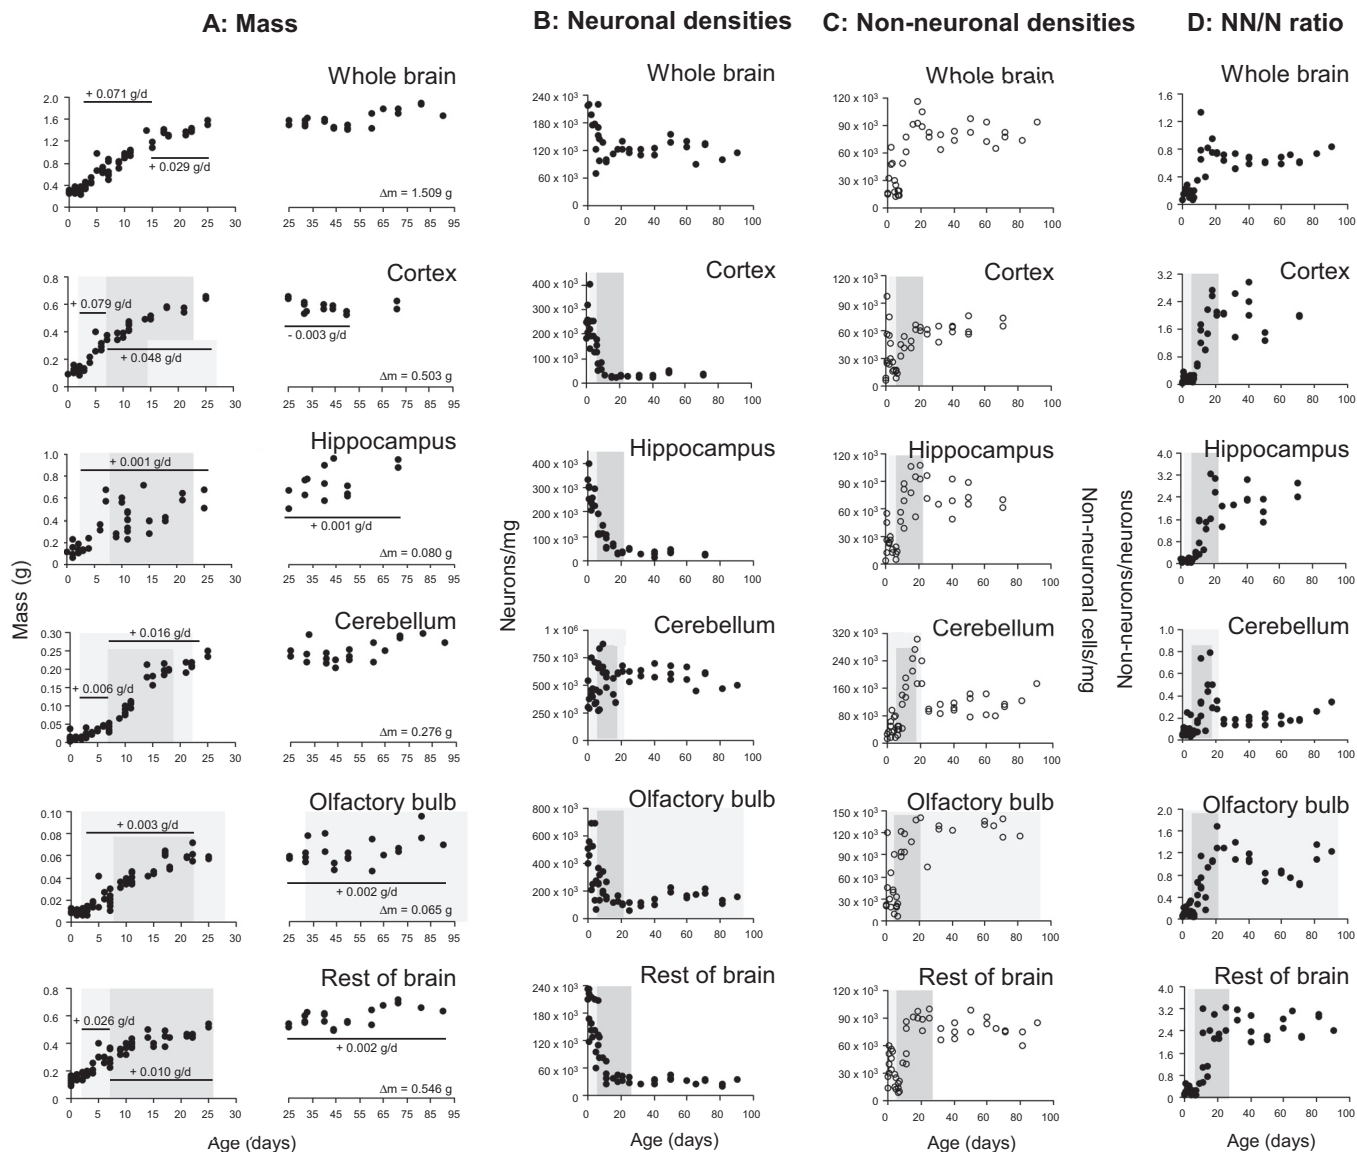

**Fig. S1.** Postnatal changes in the rat brain. (A) Postnatal changes in brain mass. Each filled circle represents the mass of the brain structures indicated or of the whole brain of 1 individual animal. The first postnatal month is shown on the left and the second and third postnatal months are shown on the right with the same Y scale. Periods of net addition of neuronal and non-neuronal cells in each structure are indicated, for reference, in light and dark gray shading, respectively. Total growth of each structure between birth and adulthood is indicated ( $\Delta m$ ). No significant change in brain mass is found during the first 3 postnatal days. Thereafter, brain growth ensues at the rates indicated (linear regression,  $P < 0,05$ ) until P25 and, in the hippocampus, olfactory bulb and rest of brain, continues during the second and third postnatal months. The cerebral cortex is the only structure examined to lose mass postnatally, between P25 and P50. (B and C) Postnatal changes in cell densities. Each circle represents the density of neurons (B, filled circles) or of non-neuronal cells (C, white circles) found in the brain structures indicated or in the whole brain of 1 individual animal. Periods of net addition of neuronal and non-neuronal cells in each structure are indicated, for reference, in light and dark gray shading, respectively. Neuronal cell densities decrease exponentially during the first 2 postnatal weeks in all structures other than the cerebellum, then remain stable thereafter, while non-neuronal cell densities decrease during the first postnatal week, increase over the second and third postnatal weeks, and remain stable thereafter. (D) Postnatal changes in the non-neuronal/neuronal ratio. Each circle represents the ratio between the number of non-neuronal and neuronal cells found in the brain structures indicated or in the whole brain of 1 individual animal. This ratio does not vary significantly during the first postnatal week, then increases during the second and third weeks, when net addition of non-neuronal cells occurs, in all structures except for the cerebellum. Periods of net addition of neuronal and non-neuronal cells in each structure are indicated, for reference, in light and dark gray shading, respectively.

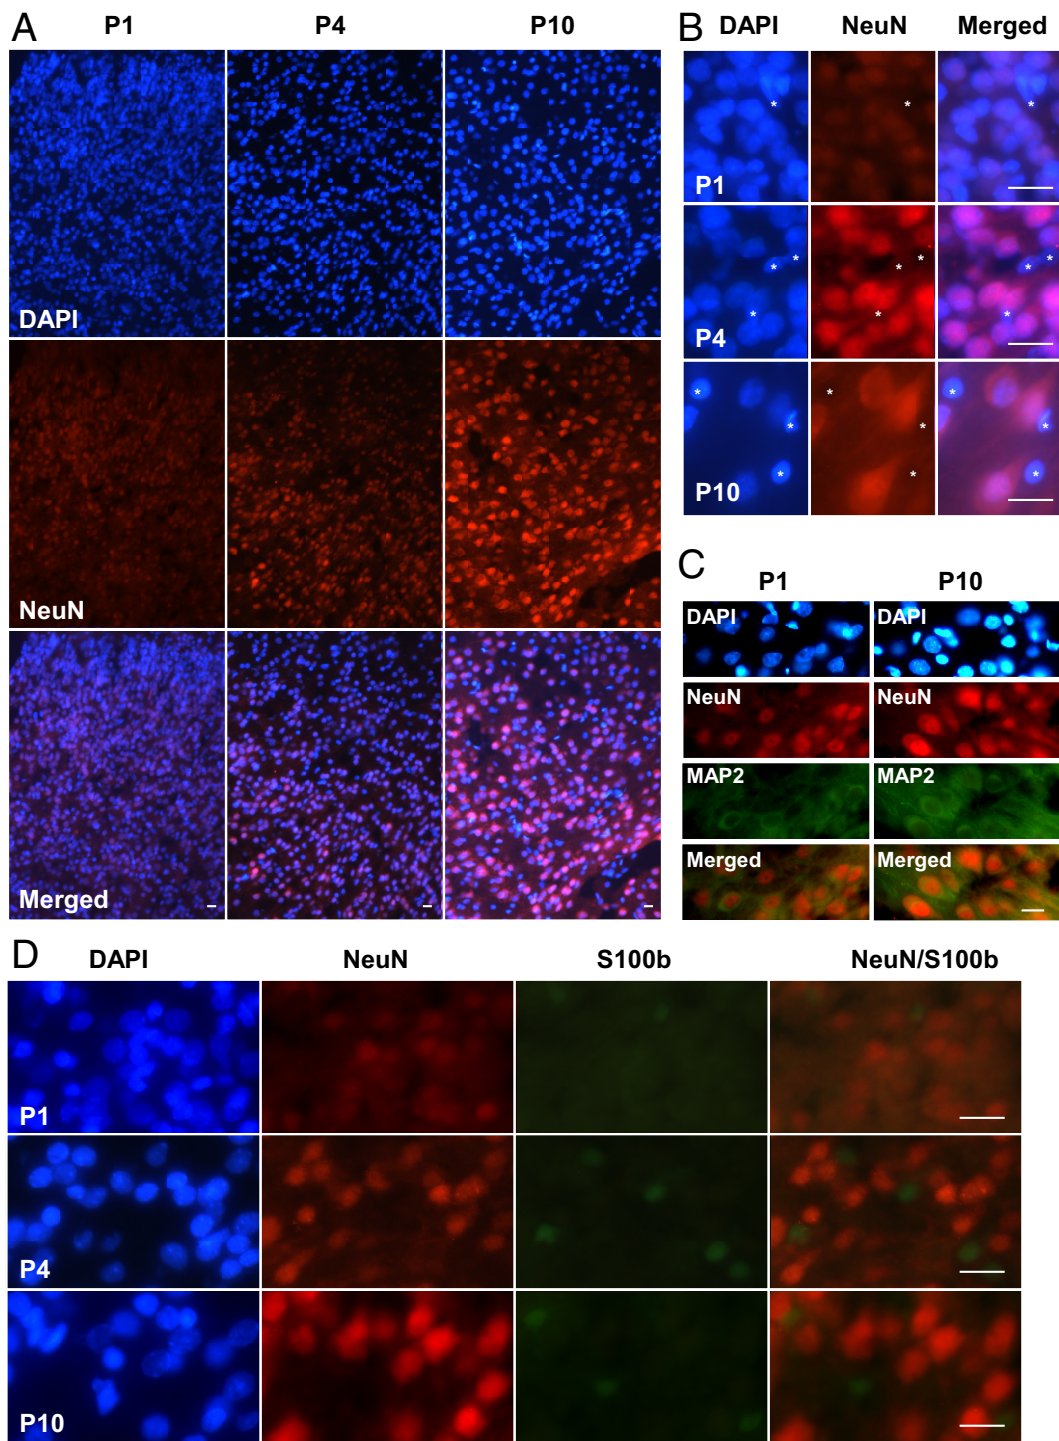

**Fig. 52.** NeuN labeling in frozen brain sections. (A) Photomicrographs of sections through the cerebral cortex at P1, P4, and P10 taken at the same magnification. Notice that the vast majority of cells are NeuN-positive and have large, round nuclei that increase in size and become more dispersed from P1 to P10. Merged images (bottom) show that most NeuN-negative nuclei have a different, smaller and more elongated morphology. (B) Larger magnification of the cerebral cortex at P1, P4, and P10 show that NeuN-positive nuclei appear to increase in size from P1 to P10; since the perikaryon is also labeled, most NeuN-positive cells exhibit, already at P4, a clear pyramidal shape and large nuclei, strikingly different from the neighboring NeuN-negative nuclei (asterisks). (C) Double-labeling for NeuN and MAP2 shows that all cells expressing MAP2 have NeuN-positive nuclei, and all such nuclei are surrounded by MAP2-positive fibers, at both P1 and P10. Notice the distinct morphology of the NeuN-positive nuclei. (D) Double-labeling for NeuN and the astrocyte marker S100b show that no cells express the 2 markers simultaneously. Notice that most NeuN-labeled nuclei are large and belong to pyramidal-shaped cells, whereas S100b-positive nuclei are small. (Scale bars, 2  $\mu$ m.)

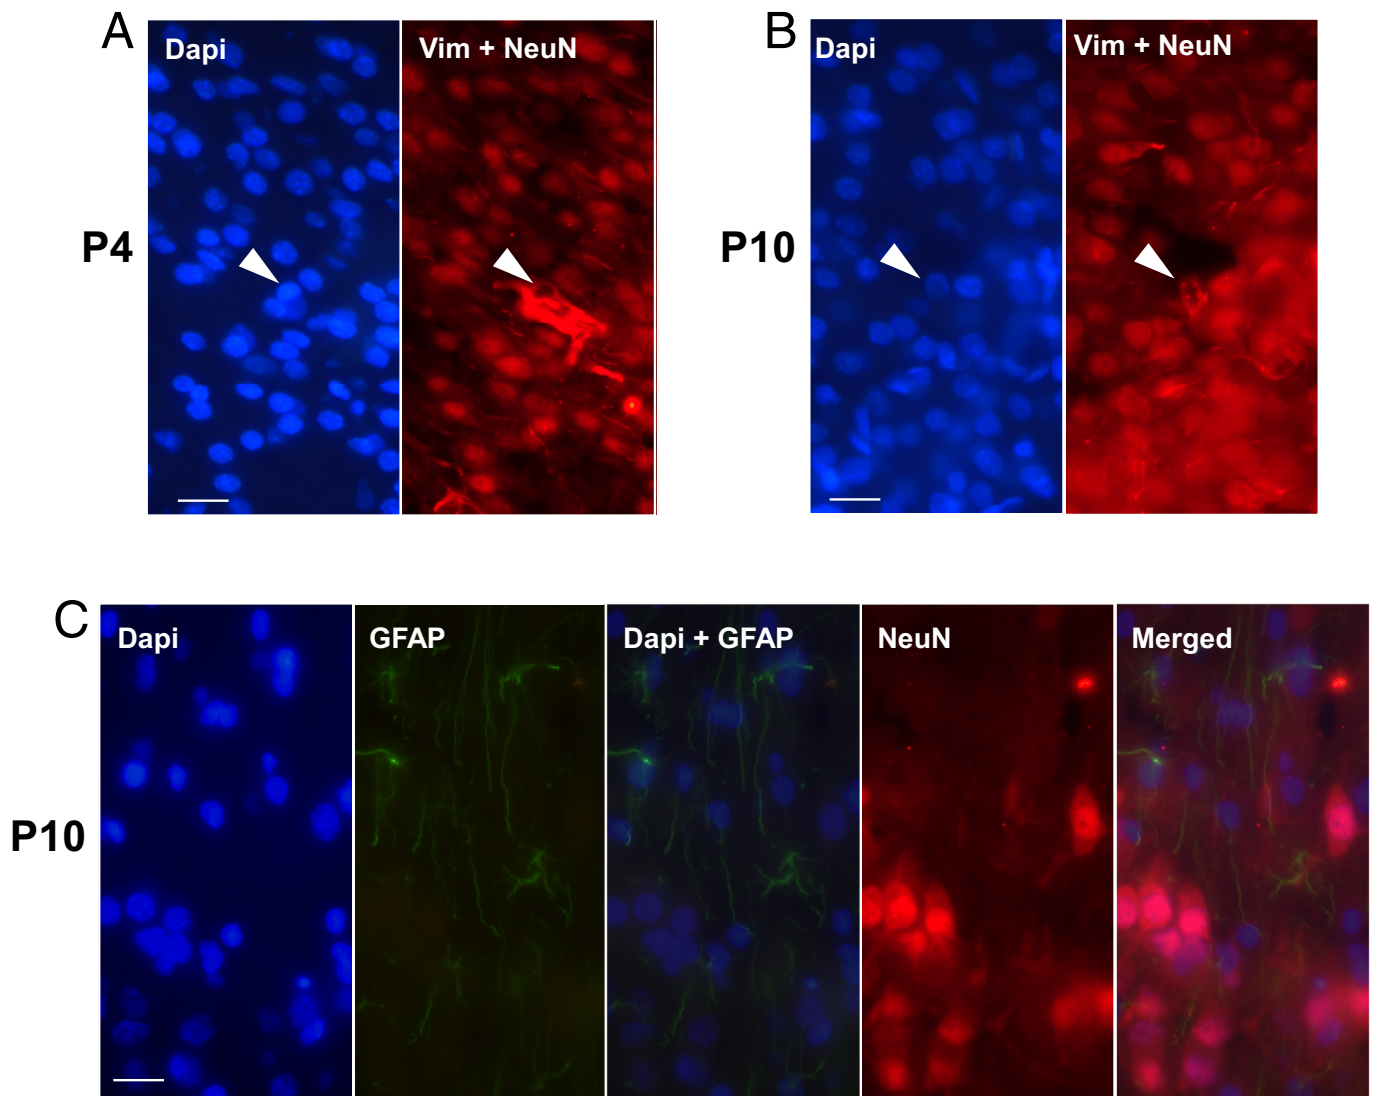

**Fig. S3.** NeuN-labeled neurons do not express vimentin or GFAP in situ. (A and B) Photomicrographs of the cerebral cortex at P4 (A) or P10 (B) double-labeled for NeuN and vimentin with the same secondary antibody (since both anti-NeuN and anti-vimentin are mouse monoclonal primary antibodies). Nuclei that are surrounded by a ring of staining have no label, and conversely, labeled nuclei lack a surrounding ring of staining, suggesting that NeuN-positive nuclei do not express this early glial marker. (C) photomicrographs of the cerebral cortex at P10 double-labeled for NeuN and GFAP show that NeuN-positive nuclei are not surrounded by GFAP staining. (Scale bars, 2  $\mu\text{m}$ .)

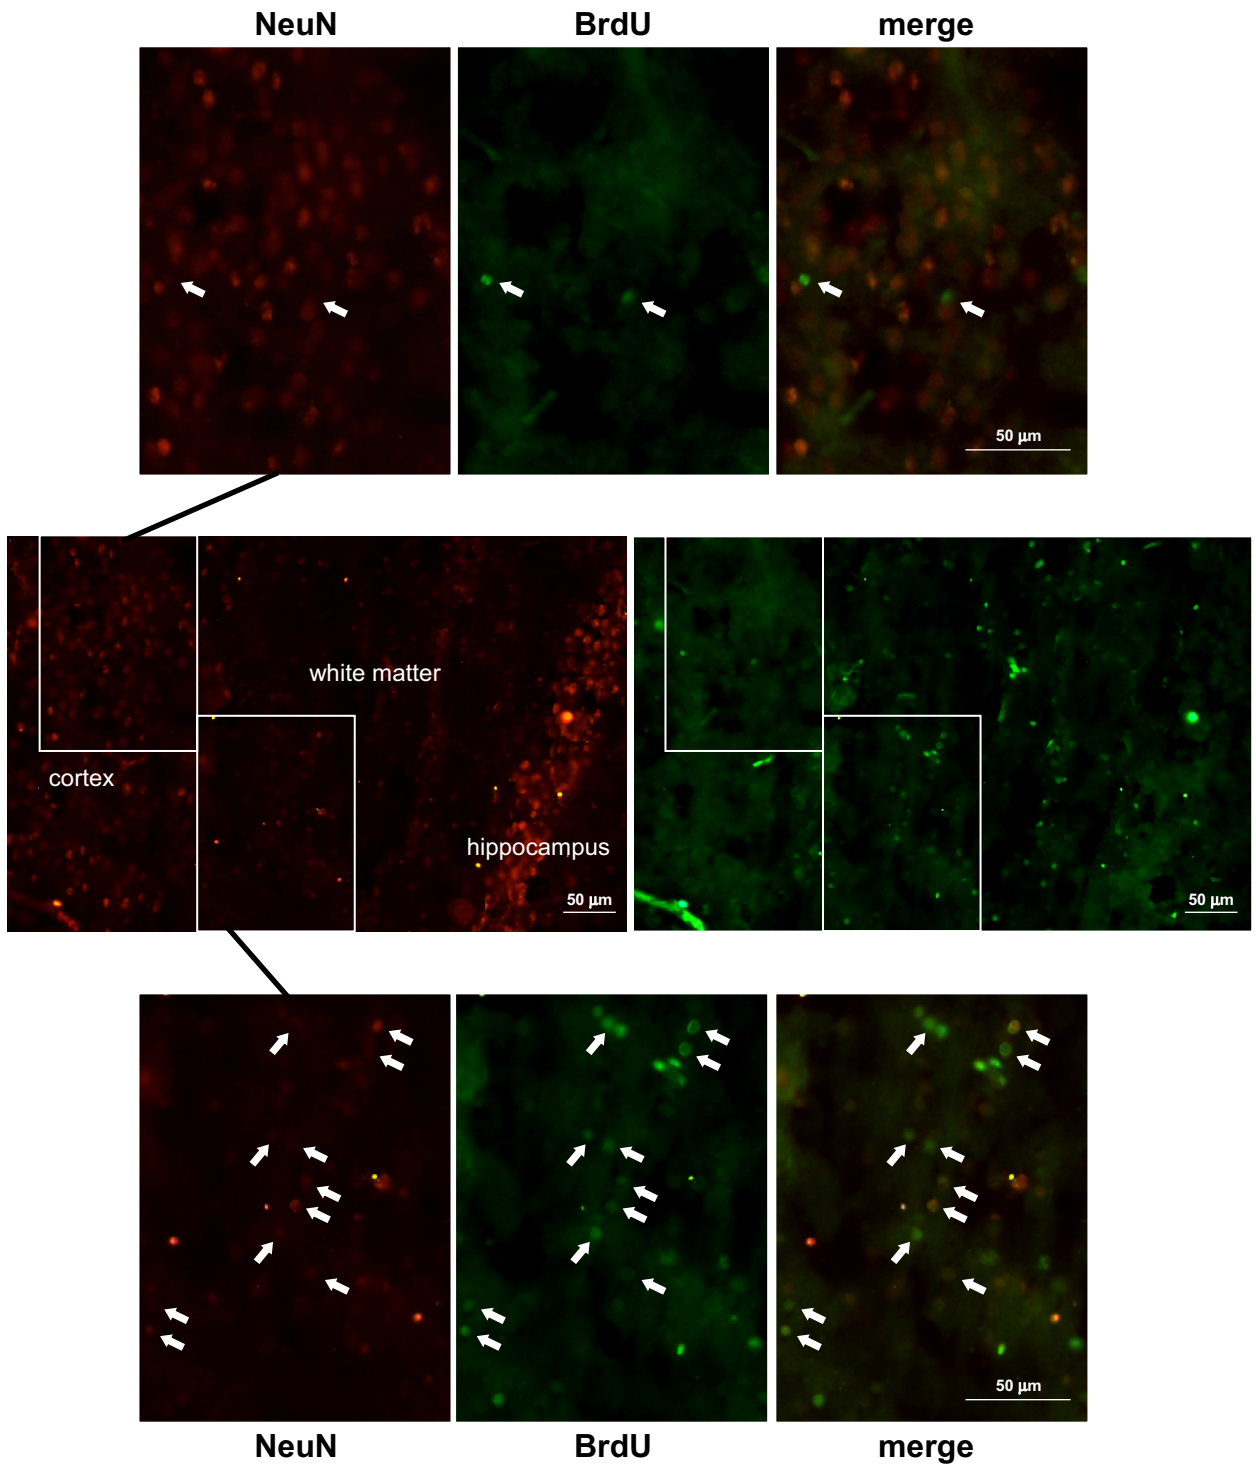

**Fig. S4.** Cells with BrdU-labeled nuclei at P5 after a single injection at P4 are NeuN-positive. (*Center*) Low-power photomicrographs of the cerebral cortex at P5 double-labeled for NeuN (*Left*) and BrdU (*Right*) shows BrdU-labeled nuclei in the white matter between the cerebral cortex and the hippocampus, some of which are weakly while others are strongly positive for NeuN. Insets are expanded, showing that the BrdU-labeled nuclei in the white matter are NeuN-positive (*Bottom*) and showing that only a minority of the NeuN-positive nuclei already established in the cerebral cortex are BrdU-labeled (*Top*).





Table S2 continued. Cerebral cortex

| Age   | <i>n</i> | Mass, g       | Cells, millions | Neurons, millions | Non-neurons, millions | % NeuN+     |
|-------|----------|---------------|-----------------|-------------------|-----------------------|-------------|
| P0    | 2        | 0.095 ± 0.001 | 21.07 ± 4.34    | 20.34 ± 4.54      | 0.73 ± 0.20           | 96.4 ± 1.7  |
| P1    | 5        | 0.120 ± 0.023 | 35.45 ± 1.61    | 30.15 ± 2.44      | 5.30 ± 3.06           | 85.2 ± 8.1  |
| P2    | 4        | 0.128 ± 0.030 | 37.65 ± 9.07    | 29.10 ± 7.11      | 5.98 ± 2.25           | 83.3 ± 2.9  |
| P3    | 2        | 0.125 ± 0.011 | 32.64 ± 0.86    | 27.84 ± 2.78      | 4.81 ± 1.91           | 85.2 ± 6.3  |
| P4    | 2        | 0.196 ± 0.032 | 46.70 ± 1.74    | 42.72 ± 1.10      | 3.98 ± 0.64           | 91.5 ± 1.1  |
| P5    | 2        | 0.328 ± 0.098 | 37.43           | 32.93             | 4.50                  | 83.5 ± 6.4  |
| P6    | 3        | 0.291 ± 0.026 | 48.26 ± 6.74    | 44.15 ± 5.89      | 4.11 ± 1.65           | 91.6 ± 3.1  |
| P7    | 2        | 0.358 ± 0.023 | 28.47 ± 5.78    | 23.44 ± 6.04      | 5.03 ± 0.26           | 81.9 ± 4.6  |
| P9    | 2        | 0.368 ± 0.032 | 37.28 ± 6.27    | 25.20 ± 5.49      | 14.09 ± 1.90          | 64.0 ± 1.9  |
| P11   | 4        | 0.439 ± 0.035 | 39.85 ± 8.95    | 14.35 ± 0.57      | 21.48 ± 4.42          | 40.4 ± 4.7  |
| P15   | 2        | 0.502 ± 0.016 | 35.54 ± 1.62    | 12.73 ± 1.66      | 22.81 ± 3.28          | 36.0 ± 6.3  |
| P18   | 2        | 0.579 ± 0.011 | 50.88 ± 1.53    | 13.97 ± 0.01      | 36.92 ± 1.51          | 27.5 ± 0.8  |
| P21   | 2        | 0.560 ± 0.025 | 51.54 ± 0.12    | 16.86 ± 0.28      | 34.68 ± 0.40          | 32.7 ± 0.6  |
| P25   | 2        | 0.649 ± 0.016 | 56.57 ± 2.16    | 18.55 ± 0.52      | 38.02 ± 1.64          | 32.8 ± 0.3  |
| P32   | 2        | 0.568 ± 0.050 | 49.28 ± 7.47    | 16.82 ± 2.53      | 32.46 ± 10.00         | 34.9 ± 10.4 |
| P40   | 3        | 0.579 ± 0.021 | 51.16 ± 3.90    | 15.11 ± 3.20      | 36.05 ± 0.86          | 29.3 ± 4.0  |
| P50   | 3        | 0.534 ± 0.014 | 58.95 ± 6.55    | 25.07 ± 1.58      | 33.87 ± 5.15          | 42.7 ± 2.4  |
| P60   | 0        | n.a.          | n.a.            | n.a.              | n.a.                  | n.a.        |
| P65   | 0        | n.a.          | n.a.            | n.a.              | n.a.                  | n.a.        |
| P71   | 2        | 0.598 ± 0.040 | 62.16 ± 1.02    | 20.80 ± 0.55      | 41.36 ± 0.47          | 33.5 ± 0.3  |
| P81   | 0        | n.a.          | n.a.            | n.a.              | n.a.                  | n.a.        |
| P90   | 0        | n.a.          | n.a.            | n.a.              | n.a.                  | n.a.        |
| Total | 46       |               |                 |                   |                       |             |

Values are mean ± standard deviation. % NeuN+, percentage of NeuN-positive nuclei relative to all nuclei in the structure. n.a., not applicable.

Table S2 continued. Hippocampus

| Age   | <i>n</i> | Mass, g               | Cells, millions | Neurons, millions | Non-neurons, millions | % NeuN+     |
|-------|----------|-----------------------|-----------------|-------------------|-----------------------|-------------|
| P0    | 1        | 0.011                 | 3.72            | 3.68              | 0.01                  | 92.8 ± 8.7  |
| P1    | 5        | 0.012 ± 0.007         | 3.32 ± 1.10     | 2.75 ± 0.95       | 0.34 ± 0.28           | 90.3 ± 4.9  |
| P2    | 3        | 0.015 ± 0.004         | 4.23 ± 1.51     | 3.31 ± 1.04       | 0.30 ± 0.05           | 91.4 ± 1.6  |
| P3    | 2        | 0.013 ± 0.001         | 3.52 ± 0.06     | 3.16 ± 0.06       | 0.36 ± 0.01           | 89.6 ± 0.1  |
| P4    | 2        | 0.020 ± 0.006         | 5.16 ± 0.71     | 4.88 ± 0.66       | 0.28 ± 0.05           | 94.7 ± 0.3  |
| P5    | 2        | n.a.                  | 7.70 ± 0.33     | 6.53 ± 0.01       | 1.17 ± 0.32           | 84.9 ± 3.6  |
| P6    | 3        | 0.033 ± 0.003         | 4.87 ± 1.15     | 4.48 ± 1.35       | 0.39 ± 0.20           | 91.2 ± 5.7  |
| P7    | 2        | 0.063 ± 0.008         | 7.67 ± 0.66     | 6.80 ± 0.54       | 0.87 ± 0.12           | 88.7 ± 0.6  |
| P9    | 2        | 0.027 ± 0.002         | 4.15 ± 1.39     | 3.04 ± 0.92       | 1.11 ± 0.48           | 73.9 ± 4.4  |
| P11   | 4        | 0.040 ± 0.009         | 5.80 ± 1.55     | 3.04 ± 1.21       | 2.77 ± 1.12           | 52.2 ± 16.8 |
| P15   | 2        | 0.034 ± 0.008         | 5.52 ± 2.26     | 2.29 ± 0.78       | 3.23 ± 1.48           | 42.2 ± 3.1  |
| P18   | 2        | 0.042 ± 0.002         | 4.33 ± 1.44     | 1.26 ± 0.01       | 3.07 ± 1.44           | 30.8 ± 10.4 |
| P21   | 2        | 0.061 ± 0.005         | 8.35 ± 1.32     | 2.17 ± 0.14       | 6.18 ± 1.18           | 26.2 ± 2.5  |
| P25   | 2        | 0.060 ± 0.012         | 7.87 ± 0.81     | 2.99 ± 0.87       | 4.87 ± 0.06           | 37.7 ± 7.2  |
| P32   | 2        | 0.077 ( <i>n</i> = 1) | 6.49 ± 1.15     | 1.73 ± 0.85       | 4.76 ± 0.30           | 25.9 ± 8.5  |
| P40   | 3        | 0.074 ± 0.017         | 7.50 ± 3.26     | 2.20 ± 1.11       | 5.30 ± 2.16           | 28.4 ± 3.3  |
| P50   | 3        | 0.067 ± 0.005         | 7.70 ± 1.28     | 2.69 ± 0.67       | 5.01 ± 0.84           | 34.8 ± 4.9  |
| P60   | 0        | n.a.                  | n.a.            | n.a.              | n.a.                  | n.a.        |
| P65   | 0        | n.a.                  | n.a.            | n.a.              | n.a.                  | n.a.        |
| P71   | 2        | 0.092 ± 0.005         | 8.38 ± 0.63     | 2.31 ± 0.38       | 6.07 ± 0.24           | 27.4 ± 2.5  |
| P81   | 0        | n.a.                  | n.a.            | n.a.              | n.a.                  | n.a.        |
| P90   | 0        | n.a.                  | n.a.            | n.a.              | n.a.                  | n.a.        |
| Total | 41       |                       |                 |                   |                       |             |

Values are mean ± standard deviation. % NeuN+, percentage of NeuN-positive nuclei relative to all nuclei in the structure. n.a., not applicable.



Table S2 continued. Cerebellum

| Age   | N  | Mass, g       | Cells, millions | Neurons, millions | Non-neurons, millions | % NeuN+     |
|-------|----|---------------|-----------------|-------------------|-----------------------|-------------|
| P0    | 2  | 0.010 ± 0.003 | 4.16 ± 0.56     | 3.97 ± 0.53       | 0.19 ± 0.04           | 95.4 ± 0.3  |
| P1    | 5  | 0.013 ± 0.004 | 5.42 ± 1.00     | 5.72 ± 1.05       | 0.56 ± 0.01           | 90.9 ± 1.6  |
| P2    | 4  | 0.013 ± 0.004 | 7.26 ± 0.88     | 6.53 ± 0.72       | 0.51 ± 0.26           | 92.9 ± 1.6  |
| P3    | 2  | 0.014 ± 0.002 | 6.73 ± 1.14     | 5.88 ± 1.61       | 0.84 ± 0.46           | 86.7 ± 9.2  |
| P4    | 2  | 0.026 ± 0.005 | 14.01 ± 4.55    | 12.66 ± 4.12      | 1.35 ± 0.43           | 90.3 ± 0.1  |
| P5    | 0  | 0.034 ± 0.004 | 15.24 ± 2.85    | 13.72 ± 4.15      | 1.51 ± 1.30           | 89.1 ± 10.6 |
| P6    | 3  | 0.046 ± 0.001 | 26.40 ± 11.08   | 24.70 ± 10.55     | 1.71 ± 0.62           | 93.2 ± 1.4  |
| P7    | 2  | 0.048 ± 0.007 | 31.41 ± 8.89    | 29.37 ± 8.84      | 2.07 ± 0.01           | 93.2 ± 1.8  |
| P9    | 3  | 0.066 ± 0.001 | 53.60 ± 11.55   | 47.08 ± 8.72      | 6.52 ± 3.29           | 88.3 ± 4.5  |
| P11   | 4  | 0.106 ± 0.009 | 71.78 ± 15.54   | 61.14 ± 7.62      | 17.86 ± 3.01          | 77.3 ± 4.2  |
| P15   | 2  | 0.169 ± 0.017 | 120.03 ± 9.68   | 81.80 ± 8.96      | 38.23 ± 0.71          | 68.1 ± 2.0  |
| P18   | 2  | 0.199 ± 0.001 | 168.91 ± 19.82  | 121.31 ± 1.40     | 47.60 ± 18.42         | 72.3 ± 7.7  |
| P21   | 2  | 0.205 ± 0.019 | 176.56 ± 33.70  | 133.73 ± 20.28    | 42.83 ± 13.42         | 76.0 ± 3.0  |
| P25   | 2  | 0.060 ± 0.012 | 162.42 ± 7.48   | 138.97 ± 9.88     | 23.45 ± 2.40          | 85.5 ± 2.1  |
| P32   | 2  | 0.220 ± 0.000 | 156.52 ± 3.21   | 134.65 ± 7.42     | 21.87 ± 4.21          | 86.0 ± 3.0  |
| P40   | 3  | 0.230 ± 0.015 | 165.92 ± 7.19   | 141.23 ± 10.03    | 24.68 ± 3.06          | 85.1 ± 2.4  |
| P50   | 3  | 0.238 ± 0.014 | 172.33 ± 14.22  | 144.97 ± 10.71    | 27.36 ± 7.00          | 84.2 ± 3.5  |
| P60   | 2  | 0.246 ± 0.039 | 173.75 ± 2.87   | 147.03 ± 3.34     | 26.72 ± 6.22          | 84.7 ± 3.3  |
| P65   | 1  | 0.250         | 131.01          | 110.97            | 20.04                 | 84.7        |
| P71   | 2  | 0.287 ± 0.004 | 205.55 ± 4.31   | 173.82 ± 4.75     | 31.72 ± 0.44          | 84.6 ± 0.5  |
| P81   | 2  | 0.302 ± 0.006 | 175.68          | 138.96            | 36.72                 | 79.1        |
| P90   | 1  | 0.272         | 181.82          | 135.09            | 46.73                 | 74.3        |
| Total | 53 |               |                 |                   |                       |             |

Values are mean ± standard deviation. % NeuN+, percentage of NeuN-positive nuclei relative to all nuclei in the structure.

Table S2 continued. Olfactory bulb

| Age   | <i>n</i> | Mass, g       | Cells, millions | Neurons, millions    | Non-neurons, millions | % NeuN+              |
|-------|----------|---------------|-----------------|----------------------|-----------------------|----------------------|
| P0    | 2        | 0.009 ± 0.001 | 4.02 ± 0.27     | 3.84 ± 0.29          | 0.18 ± 0.02           | 95.6 ± 0.9           |
| P1    | 5        | 0.008 ± 0.002 | 4.26 ± 1.47     | 5.04 ± 0.01          | 0.79 ± 0.41           | 86.6 ± 6.2           |
| P2    | 4        | 0.009 ± 0.003 | 5.59 ± 2.74     | 3.45 ± 1.02          | 0.68 ± 0.40           | 84.4 ± 4.4           |
| P3    | 2        | 0.008 ± 0.003 | 3.09 ± 0.62     | 2.80 ± 0.47          | 0.29 ± 0.15           | 91.0 ± 2.9           |
| P4    | 2        | 0.016 ± 0.003 | 6.74 ± 5.07     | 6.09 ± 5.17          | 0.65 ± 0.10           | 85.8 ± 12.1          |
| P5    | 2        | 0.028 ± 0.020 | 4.20 ± 1.36     | 3.36 ± 0.74          | 0.84 ± 0.63           | 81.5 ± 9.0           |
| P6    | 3        | 0.025 ± 0.003 | 7.72 ± 0.41     | 7.11 ± 0.51          | 0.61 ± 0.26           | 92.1 ± 3.3           |
| P7    | 2        | 0.027 ± 0.004 | 6.20 ± 2.78     | 5.81 ± 2.51          | 0.38 ± 0.27           | 94.3 ± 1.8           |
| P9    | 3        | 0.033 ± 0.003 | 11.05 ± 2.20    | 7.79 ± 2.59          | 3.26 ± 0.45           | 69.3 ± 9.5           |
| P11   | 4        | 0.037 ± 0.005 | 11.90 ± 4.69    | 6.98 ± 3.39          | 4.92 ± 1.57           | 57.7 ± 8.0           |
| P15   | 2        | 0.045 ± 0.001 | 15.02 ± 7.33    | 5.08 ( <i>n</i> = 1) | 4.75 ( <i>n</i> = 1)  | 51.6 ( <i>n</i> = 1) |
| P18   | 2        | 0.049 ± 0.001 | 14.75 ± 2.01    | 7.18 ± 1.04          | 7.57 ± 0.98           | 48.6 ± 0.4           |
| P21   | 2        | 0.059 ± 0.001 | 15.29 ± 0.79    | 6.15 ± 0.37          | 9.14 ± 1.16           | 40.3 ± 4.5           |
| P25   | 2        | 0.058 ± 0.001 | 11.77 ± 6.11    | 5.13 ± 2.68          | 6.64 ± 3.43           | 43.6 ± 0.1           |
| P32   | 2        | 0.060 ± 0.004 | 14.06 ± 2.28    | 6.34 ± 1.62          | 7.71 ± 0.66           | 44.8 ± 4.3           |
| P40   | 2        | 0.072 ± 0.011 | 18.07 ± 1.04    | 8.59 ± 0.49          | 9.48 ± 0.72           | 47.5 ± 1.8           |
| P50   | 3        | 0.059 ± 0.003 | 21.31 ± 1.12    | 12.49 ± 0.50         | 9.43 ± 1.02           | 57.0 ± 3.6           |
| P60   | 2        | 0.060 ± 0.021 | 17.68 ± 6.80    | 9.54 ± 3.81          | 8.14 ± 2.99           | 53.8 ± 0.8           |
| P65   | 1        | 0.060         | 18.25           | 10.48                | 7.77                  | 57.4                 |
| P71   | 2        | 0.066 ± 0.002 | 21.33 ± 2.37    | 13.06 ± 1.42         | 8.28 ± 0.95           | 61.2 ± 0.1           |
| P81   | 2        | 0.086 ± 0.014 | 22.81 ± 1.96    | 10.31 ± 0.01         | 12.49 ± 1.97          | 45.4 ± 4.0           |
| P90   | 1        | 0.070         | 24.17           | 10.80                | 13.37                 | 44.7                 |
| Total | 52       |               |                 |                      |                       |                      |

Values are mean ± standard deviation. % NeuN+, percentage of NeuN-positive nuclei relative to all nuclei in the structure.

Table S2 continued. Remaining areas

| Age   | <i>n</i> | Mass, g       | Cells, millions | Neurons, millions     | Non-neurons, millions | % NeuN+              |
|-------|----------|---------------|-----------------|-----------------------|-----------------------|----------------------|
| P0    | 2        | 0.128 ± 0.004 | 30.66 ± 2.39    | 28.14 ± 1.33          | 2.51 ± 1.06           | 91.9 ± 2.8           |
| P1    | 5        | 0.155 ± 0.017 | 35.59 ± 3.74    | 28.35 ± 6.08          | 7.01 ± 2.00           | 79.4 ± 8.9           |
| P2    | 4        | 0.171 ± 0.028 | 37.90 ± 5.62    | 27.83 ± 1.08          | 7.39 ± 1.00           | 79.1 ± 1.6           |
| P3    | 2        | 0.176 ± 0.003 | 35.68 ± 4.90    | 22.60 ( <i>n</i> = 1) | 9.62 ( <i>n</i> = 1)  | 70.2 ( <i>n</i> = 1) |
| P4    | 2        | 0.231 ± 0.034 | 44.88 ± 6.54    | 40.04 ± 4.91          | 4.84 ± 1.63           | 89.4 ± 2.1           |
| P5    | 2        | 0.354 ± 0.070 | 32.60 ± 5.39    | 26.30 ± 3.51          | 6.30 ± 1.88           | 80.9 ± 2.6           |
| P6    | 3        | 0.289 ± 0.023 | 46.29 ± 11.09   | 42.33 ± 10.71         | 3.97 ± 1.55           | 91.3 ± 3.3           |
| P7    | 2        | 0.363 ± 0.004 | 43.87 ± 8.40    | 38.13 ± 11.49         | 5.74 ± 3.09           | 86.0 ± 9.7           |
| P9    | 3        | 0.342 ± 0.024 | 41.41 ± 3.45    | 25.97 ( <i>n</i> = 1) | 13.17 ( <i>n</i> = 1) | 66.3 ( <i>n</i> = 1) |
| P11   | 4        | 0.393 ± 0.011 | 43.06 ± 4.22    | 18.06 ± 8.89          | 25.01 ± 8.07          | 41.6 ± 18.6          |
| P15   | 2        | 0.386 ± 0.018 | 43.81 ± 6.43    | 14.22 ( <i>n</i> = 1) | 34.13 ( <i>n</i> = 1) | 29.4 ( <i>n</i> = 1) |
| P18   | 2        | 0.439 ± 0.001 | 57.71 ± 6.79    | 16.58 ± 4.79          | 41.13 ± 2.18          | 28.4 ± 4.9           |
| P21   | 2        | 0.458 ± 0.016 | 54.97 ± 5.06    | 17.20 ± 2.23          | 37.77 ± 2.83          | 31.2 ± 1.2           |
| P25   | 2        | 0.528 ± 0.018 | 68.64 ± 10.81   | 18.29 ± 5.59          | 50.35 ± 5.22          | 26.3 ± 4.0           |
| P32   | 2        | 0.553 ± 0.010 | 53.66 ± 6.05    | 13.50 ± 0.59          | 40.16 ± 5.47          | 25.3 ± 1.8           |
| P40   | 3        | 0.595 ± 0.031 | 63.89 ± 9.22    | 18.90 ± 4.10          | 45.00 ± 6.15          | 29.4 ± 3.9           |
| P50   | 3        | 0.554 ± 0.007 | 67.69 ± 10.95   | 21.64 ± 2.91          | 46.05 ± 8.05          | 32.1 ± 0.8           |
| P60   | 2        | 0.588 ± 0.081 | 70.42 ± 6.95    | 19.32 ± 3.05          | 51.10 ± 3.90          | 27.4 ± 1.6           |
| P65   | 1        | 0.672         | 69.68           | 16.86                 | 52.82                 | 24.2                 |
| P71   | 2        | 0.705 ± 0.014 | 77.16 ± 2.35    | 24.07 ± 0.94          | 53.09 ± 1.41          | 31.2 ± 0.3           |
| P81   | 2        | 0.661 ± 0.001 | 59.58 ± 9.66    | 15.03 ± 2.31          | 44.55 ± 7.35          | 25.3 ± 0.2           |
| P90   | 1        | 0.630         | 75.84           | 22.15                 | 53.69                 | 29.2                 |
| Total | 47       |               |                 |                       |                       |                      |

Values are mean ± standard deviation. % NeuN+, percentage of NeuN-positive nuclei relative to all nuclei in the structure.

Table S3. Postnatal changes in the number of neurons in different structures of the rat brain

|                                         | Cerebral cortex             | Hippocampus                 | Cerebellum                  | Olfactory bulb              | Rest of brain               |
|-----------------------------------------|-----------------------------|-----------------------------|-----------------------------|-----------------------------|-----------------------------|
| Dormant period                          | P0-P3                       | P0-P3                       | P0-P3                       | P0-P3                       | P0-P3                       |
| P0, 10 <sup>6</sup>                     | 20.3 ± 4.5                  | 2.7 ± 0.9                   | 4.0 ± 0.5                   | 3.8 ± 0.3                   | 28.3 ± 4.7                  |
| P3, 10 <sup>6</sup>                     | 27.8 ± 2.8                  | 3.2 ± 0.1                   | 5.9 ± 1.6                   | 2.8 ± 0.5                   | 26.5 ± 2.8                  |
| Variation                               | No change                   |
| Addition of neurons                     | P3-P6                       | P3-P7                       | P3-P21                      | P3-Adult                    | P3-P6                       |
| No. neurons at maximum, 10 <sup>6</sup> | 44.2 ± 5.9                  | 6.8 ± 0.5                   | 133.7 ± 20.3                | 11.5 ± 1.6                  | 42.3 ± 10.7                 |
| Increase from P0                        | 118%                        | 152%                        | 3142%                       | 203%                        | 49%                         |
| Neurons added from P0 to maximum        | 23.9 × 10 <sup>6</sup>      | 4.1 × 10 <sup>6</sup>       | 129.7 × 10 <sup>6</sup>     | 7.7 × 10 <sup>6</sup>       | 14.0 × 10 <sup>6</sup>      |
| Rate of addition during period          | +5.5 × 10 <sup>6</sup> /day | +0.9 × 10 <sup>6</sup> /day | +6.2 × 10 <sup>6</sup> /day | +0.1 × 10 <sup>6</sup> /day | +5.3 × 10 <sup>6</sup> /day |
| Neuronal loss                           | P6-P15                      | P7-P15                      | n.a.                        | n.a.                        | P6-P15                      |
| No. neurons at minimum, 10 <sup>6</sup> | 12.7 ± 1.7                  | 2.3 ± 0.8                   | n.a.                        | n.a.                        | 15.8 ± 3.7                  |
| Decrease from maximum                   | -71%                        | -66%                        | n.a.                        | n.a.                        | -63%                        |
| Neurons lost from maximum               | -31.5 × 10 <sup>6</sup>     | -4.5 × 10 <sup>6</sup>      | n.a.                        | n.a.                        | -26.5 × 10 <sup>6</sup>     |

Numbers of neurons in each structure are mean ± standard deviation in millions. Variation, increase and net number of neurons added or lost in the period are given whenever the difference between start and end points indicated is significant ( $P < 0.05$ ); n.a., not applicable.

**Table S4. Postnatal changes in the number of non-neuronal cells in different structures of the rat brain**

|                                                  | Cerebral cortex               | Hippocampus                   | Cerebellum                    | Olfactory bulb                | Rest of brain                 |           |
|--------------------------------------------------|-------------------------------|-------------------------------|-------------------------------|-------------------------------|-------------------------------|-----------|
| Dormant period and net addition of neurons       | P1-P7                         | P1-P6                         | P0-P6                         | P0-P7                         | P1-P7                         |           |
| P0 or P1, $10^6$                                 | $5.3 \pm 3.1$                 | $0.3 \pm 0.1$                 | $0.2 \pm 0.0$                 | $0.2 \pm 0.0$                 | $7.0 \pm 2.0$                 |           |
| P6 or P7, $10^6$                                 | $5.0 \pm 0.3$                 | $0.4 \pm 0.2$                 | $1.7 \pm 0.6$                 | $0.4 \pm 0.3$                 | $5.7 \pm 3.1$                 |           |
| Variation                                        | No change                     | No change                     | 1.5 million                   | No change                     | No change                     |           |
| Addition of non-neuronal cells                   | P7-P21                        | P6-P21                        | P6-P17                        | P7-P21                        | P7-P25                        |           |
| No. neurons at end of period, $10^6$             | $34.7 \pm 0.4$                | $6.2 \pm 1.2$                 | $45.0 \pm 11.7$               | $9.1 \pm 1.2$                 | $50.4 \pm 5.2$                |           |
| Increase from P0 or P1                           | 50×                           | 20.7×                         | 225×                          | 45.5×                         | 20.2×                         |           |
| Non-neurons added from P0 or P1 to end of period | $34.0 \times 10^6$            | $5.9 \times 10^6$             | $44.8 \times 10^6$            | $8.9 \times 10^6$             | $44.7 \times 10^6$            |           |
| Rate of addition during period                   | $+2.1 \times 10^6/\text{day}$ | $+0.3 \times 10^6/\text{day}$ | $+4.8 \times 10^6/\text{day}$ | $+0.5 \times 10^6/\text{day}$ | $+2.2 \times 10^6/\text{day}$ |           |
| Further change                                   | P21-adult                     | No change                     | P17-P25                       | P25-adult                     | No change                     | No change |
| No. non-neurons at end of period, $10^6$         | $41.4 \pm 0.5$                | n.a.                          | $23.4 \pm 2.4$                | $36.7 \pm 7.1$                | n.a.                          | n.a.      |
| Variation                                        | 1.2×                          | n.a.                          | 0.5×                          | 1.6×                          | n.a.                          | n.a.      |
| Difference                                       | $6.7 \times 10^6$             | n.a.                          | $-21.6 \times 10^6$           | $13.3 \times 10^6$            | n.a.                          | n.a.      |

Numbers of non-neuronal cells in each structure are mean  $\pm$  standard deviation in millions. Variation, increase and net number of non-neuronal cells added or lost in the period are given whenever the difference between start and end points indicated is significant ( $P < 0.05$ ); n.a., not applicable.

Table S5. Postnatal changes in structure mass as a function of the number of cells

|                               | Cerebral cortex                                      | Hippocampus                      | Cerebellum                                                   | Olfactory bulb                                           | Rest of brain                                |
|-------------------------------|------------------------------------------------------|----------------------------------|--------------------------------------------------------------|----------------------------------------------------------|----------------------------------------------|
| Dormant period                | P0-P3                                                | P0-P3                            | P0-P3                                                        | P0-P3                                                    | P0-P3                                        |
| $\alpha$ , $M \sim N^\alpha$  | n.s.                                                 | 1.125                            | n.s.                                                         | n.s.                                                     | n.s.                                         |
| $\alpha$ , $M \sim NN^\alpha$ | n.s.                                                 | 0.419                            | n.s.                                                         | n.s.                                                     | n.s.                                         |
| Main factors                  | n.s.                                                 | See legend                       | n.s.                                                         | n.s.                                                     | n.s.                                         |
| Addition of neurons           | P3-P6                                                | P3-P7                            | P3-P21                                                       | P3-Adult                                                 | P3-P6                                        |
| $\alpha$ , $M \sim N^\alpha$  | 1.146                                                | 1.489                            | 0.862                                                        | 0.749                                                    | n.s.                                         |
| $\alpha$ , $M \sim NN^\alpha$ | n.s.                                                 | n.s.                             | 0.509                                                        | 0.395                                                    | n.s.                                         |
| Main factors                  | More neurons<br>Larger cell size                     | More neurons<br>Larger cell size | More neurons<br>More<br>non-neurons<br>Smaller cell size     | More neurons<br>More<br>non-neurons<br>Smaller cell size | Larger cell size                             |
| Addition of non-neurons       | P6-P15                                               | P7-P15                           | P6-P17                                                       | P7-P21                                                   | P6-P15                                       |
| $\alpha$ , $M \sim N^\alpha$  | -0.385                                               | 0.490                            | 0.863                                                        | n.s.                                                     | -0.174                                       |
| $\alpha$ , $M \sim NN^\alpha$ | 0.221                                                | n.s.                             | 0.380                                                        | 0.183                                                    | 0.105                                        |
| Main factors                  | More non-neurons<br><br>Smaller cell size            | No growth                        | More neurons<br><br>More<br>non-neurons<br>Smaller cell size | More<br><br>non-neurons<br>Smaller cell size             | More<br><br>non-neurons<br>Smaller cell size |
| Further changes               | P15-P25                                              | P25-Adult                        | P15-Adult                                                    | P17-Adult                                                | P15-Adult                                    |
| $\alpha$ , $M \sim N^\alpha$  | 0.436                                                | n.s.                             | n.s.                                                         | n.s.                                                     | 0.311                                        |
| $\alpha$ , $M \sim NN^\alpha$ | 0.370                                                | n.s.                             | 0.697                                                        | n.s.                                                     | 0.725                                        |
| Main factors                  | More neurons and<br>non-neurons<br>Smaller cell size |                                  | More<br>non-neurons<br>Smaller cell size                     | n.a.                                                     | More<br>non-neurons<br>Smaller cell size     |

Values indicated are the exponents ( $\alpha$ ) of the power functions relating structure mass (M) and number of neurons (N) or non-neuronal cells (NN). n.s., non-significant. n.a., not applicable. During the dormant period, although the hippocampus does not grow or gain cells significantly, variations in structure mass among individuals correlate with variations in the number of hippocampal neurons or non-neuronal cells according to power functions with the exponents indicated.
